# Supplementary material for: The NIH Somatic Cell Genome Editing program
Source: PubMed Central journal article supplement (PMC8026397; doi:10.1038/s41586-021-03191-1), 2021-04-07
Supplement: 41586_2021_3191_MOESM1_ESM.pdf [file 41586_2021_3191_MOESM1_ESM.pdf]

**Supplementary information**

---

**The NIH Somatic Cell Genome Editing  
program**

---

In the format provided by the  
authors and unedited

## **Supplementary note**

**In addition to the authors listed in the main paper, the following consortium members are participants in the SCGE program:**

### **Animal Reporter and Testing Center Initiative**

Nicholas R. Anderson<sup>1</sup>, Larry Bechtel<sup>2</sup>, David Bergstrom<sup>2</sup>, Benjamin Bimber<sup>3</sup>, Chandra Boosani<sup>4</sup>, Benjamin Burwitz<sup>3</sup>, Tiffany Davis<sup>2</sup>, Jeffery Duryea<sup>2</sup>, Chris Fahrenkrug<sup>5</sup>, Jonathan Green<sup>4</sup>, Carrie Hanna<sup>3</sup>, Seth Hannigan<sup>2</sup>, Dennis J. Hartigan-O'Connor<sup>6</sup>, Caleb Heffner<sup>2</sup>, Raju Ilangovan<sup>4</sup>, Dae Young Kim<sup>7</sup>, Mark Krebs<sup>2</sup>, Ralf Kühn<sup>8</sup>, Denise Lanza<sup>9</sup>, Eric Leffeler<sup>4</sup>, Alexa Martinez<sup>10</sup>, Matthew McKay<sup>2</sup>, Branden Moriarity<sup>11</sup>, Theresa Musket<sup>4</sup>, Nadia Rosenthal<sup>2</sup>, Timothy J. Safranski<sup>4</sup>, Robert Schnabel<sup>4</sup>, Susan Schommer<sup>4</sup>, John Seavitt<sup>9</sup>, Kathy Snow<sup>2</sup>, Lukkana Suksanpaisan<sup>12</sup>, Basile Tarchini<sup>2</sup>, Christopher Walkey<sup>10</sup>, Dennis Webster<sup>5</sup>, Jonathan Wilde<sup>13</sup>, Michael Wiles<sup>2</sup>, Wolfgang Wurst<sup>14</sup>

### **Biological Effects Initiative**

Amr Abdeen<sup>15</sup>, Hye-Hyun Ahn<sup>16</sup>, Alisha Birk<sup>17</sup>, Elizabeth E. Capowski<sup>18</sup>, Matthew Carter<sup>17</sup>, Yong Cheng<sup>19</sup>, Bruce Conklin<sup>17,20</sup>, Nelly Cruz<sup>21</sup>, Amritava Das<sup>15</sup>, Lorena De Onate Monje<sup>22</sup>, Micah Dombroe<sup>15</sup>, Mo R. Ebrahimkhani<sup>23</sup>, Olaia Fernandez Vila<sup>17</sup>, Maria Fernandez Zepeda<sup>24</sup>, Hongxia Fu<sup>21</sup>, Kirstan Gimse<sup>15</sup>, Stephen Gottschalk<sup>25</sup>, Navin Gupta<sup>26</sup>, Dennis J Hartigan-O'Connor<sup>6</sup>, Louisa Helms<sup>21</sup>, Jonathan Himmelfarb<sup>27</sup>, Dirk Hockemeyer<sup>22</sup>, Luke Judge<sup>20</sup>, Serah Kang<sup>17</sup>, Shalini Karthyk<sup>28</sup>, John Kelly<sup>29</sup>, Natalia G. Kolmakova<sup>30</sup>, Giedre Krenciute<sup>25</sup>, Katharina Kroll<sup>31</sup>, Bonnie Lam<sup>32</sup>, Kory Lavine<sup>33</sup>, Cicera R. Lazzarotto<sup>19</sup>, Andrea Lee<sup>19</sup>, GaHyun Lee<sup>19</sup>, Yichao Li<sup>19</sup>, Jian Ma<sup>34</sup>, Nick Malinin<sup>19</sup>, Ronald Manlapaz<sup>17</sup>, Nicholas Maragakis<sup>35</sup>, Samantha Maragh<sup>30</sup>, Krishna Maremanda<sup>28</sup>, Reid Martin<sup>25</sup>, Julie Mathieu<sup>36</sup>, Oriane Matthys<sup>17,37</sup>, Sunnie Grace McCalla<sup>15</sup>, Tyler McCullough<sup>38</sup>, Jean-Yves Metais<sup>25</sup>, Il Minn<sup>16</sup>, Kaivalya Molugu<sup>15</sup>, Ray Monnat<sup>39,40</sup>, Katherine Mueller<sup>15</sup>, Mollie O'Brien<sup>35</sup>, Jin Park<sup>41</sup>, Bikash Pattnaik<sup>42</sup>, Nicole K. Paulk<sup>43</sup>, Viswesh Periswamy<sup>15</sup>, Qian Qi<sup>19</sup>, Sarah Rockwood<sup>17</sup>, Hannele Ruohola-Baker<sup>44</sup>, Kayvan Samimi<sup>45</sup>, Shivani Saxena<sup>15</sup>, David Schaffer<sup>46</sup>, Ali Shakeri-Zadeh<sup>16</sup>, Kelly Smith<sup>47</sup>, Rupa Sridharan<sup>15</sup>, Arens Taga<sup>35</sup>, Tamara Traitteur<sup>26</sup>, Mark Velasquez<sup>32</sup>, Kayla Wolf<sup>31</sup>, Ying Xia<sup>29</sup>, Yang Yang<sup>34</sup>, Wendy Yang<sup>34</sup>, Tiffany Yee<sup>19</sup>, Ruochi Zhang<sup>34</sup>, Chengcheng Zhang<sup>26</sup>

### **Delivery Systems Initiative**

Amr Abdeen<sup>15</sup>, Safa Alfageeh<sup>48</sup>, Michele Alves-Bezerra<sup>10</sup>, Nadia Amrani<sup>49</sup>, Samir Andrade Mendonça<sup>50</sup>, Andrew Anzalone<sup>48</sup>, Chris Baehr<sup>51</sup>, Nathan Bamidele<sup>49</sup>, Youmei Bao<sup>52</sup>, Jote Bulcha<sup>53</sup>, Doug Burrin<sup>54</sup>, Ann T. Chen<sup>55</sup>, Jiakuan Chen<sup>56</sup>, Zexiang Chen<sup>49</sup>, Xiaoxia Cui<sup>57</sup>, Agnieszka Czechowicz<sup>58</sup>, Amritava Das<sup>15</sup>, Saumya Das<sup>59</sup>, Jessie R. Davis<sup>48</sup>, Yanxiang Deng<sup>55</sup>, Garth Devlin<sup>60</sup>, Carla Dibb<sup>58</sup>, Igor P. Dmitriev<sup>50</sup>, Jordan L. Doman<sup>48</sup>, Micah Dombroe<sup>15</sup>, Wan Du<sup>61</sup>, Dimas Echeverria Moreno<sup>49</sup>, Nicholas G. Economos<sup>62</sup>, Marie E. Egan<sup>63</sup>, Sayo Eweje<sup>56</sup>, Rong Fan<sup>55</sup>, Xue Gao<sup>64</sup>, Nicholas Gaston<sup>49</sup>, Kirstan Gimse<sup>15</sup>, Trevor Gonzalez<sup>65</sup>, David Guay<sup>66</sup>, Piotr Hadaczek<sup>67</sup>, Stéphanie Hallée<sup>66</sup>, Carolyn A. Haller<sup>56</sup>, Patrick Havlik<sup>60</sup>, Maomao He<sup>68</sup>, Zhi Hong Lu<sup>69</sup>, Mingqiang Huang<sup>61</sup>, Tony P. Huang<sup>48</sup>, Ayrea Hurley<sup>10</sup>, Laxmi Jakkula<sup>70</sup>, Allen Jiang<sup>71</sup>, Zachary Kennedy<sup>49</sup>, Luke W. Koblan<sup>48</sup>, Elisa Konofagou<sup>72</sup>, Sateesh Krishnamurthy<sup>73</sup>, Katarina Kulhankova<sup>73</sup>, Yeh-Hsing Lao<sup>72</sup>, Sin Lee<sup>64</sup>, Ang Li<sup>64</sup>, Yamin Li<sup>74</sup>, Yiran Li<sup>61</sup>, Shun-

Qing Liang<sup>49</sup>, Pengpeng Liu<sup>75</sup>, Corena Loeb<sup>61</sup>, Reka Lorincz<sup>50</sup>, Kevin Luk<sup>75</sup>, Alex Marson<sup>76</sup>, Sunnie Grace McCalla<sup>15</sup>, Rima Mendonsa<sup>77</sup>, Jeanette Metzger<sup>78</sup>, Shannon M. Miller<sup>48</sup>, Kaivalya Molugu<sup>15</sup>, Buhle Moyo<sup>64</sup>, Katherine Mueller<sup>15</sup>, Gregory A. Newby<sup>48</sup>, Ogo Ojelabi<sup>49</sup>, Bikash Pattnaik<sup>42</sup>, Viswesh Periswamy<sup>15</sup>, Alexandra S. Piotrowski-Daspit<sup>55</sup>, Karthikeyan Ponnianselvan<sup>75</sup>, Arun Prabhu Rameshbabu<sup>61</sup>, Min Qiu<sup>74</sup>, Elias Quijano<sup>62</sup>, Maire Rayburn<sup>58</sup>, Julia Rembetsy-Brown<sup>49</sup>, Wei Ren<sup>61</sup>, Lluís Samaranch<sup>67</sup>, Kayvan Samimi<sup>45</sup>, Shivani Saxena<sup>15</sup>, Wendy Sheu<sup>55</sup>, Rupa Sridharan<sup>15</sup>, Kristylen Tomcik<sup>79</sup>, Soumba Traore<sup>73</sup>, Christopher Walkey<sup>10</sup>, Dan Wang<sup>53</sup>, Xiuxiu Wang<sup>15</sup>, Yuyuan Wang<sup>15</sup>, Yingjie Wu<sup>61</sup>, Joshua Wythe<sup>10</sup>, Ruosen Xie<sup>15</sup>, Ying Xie<sup>52</sup>, Lingling Xu<sup>70</sup>, Fan Yang<sup>70</sup>, Zhongfeng Ye<sup>74</sup>, Han Zhang<sup>49</sup>, Kevin Zhao<sup>48</sup>, Yi Zhao<sup>15</sup>, Wenliang Zhu<sup>61</sup>

### **Dissemination and Coordinating Center Initiative**

Jeff De Pons<sup>80</sup>, Arthur Derse<sup>81</sup>, Aron M. Geurts<sup>82</sup>, Michael Grzybowski<sup>82</sup>, Matthew Hoffman<sup>82</sup>, Anne E. Kwitek<sup>82</sup>, Angela Lemke<sup>82</sup>, Rebecca Schilling<sup>82</sup>, Jennifer R. Smith<sup>80</sup>, Ryan Spellecky<sup>81</sup>, Aimee Steffenhagen<sup>82</sup>, Anne Temple<sup>82</sup>, Jyothi Thota<sup>80</sup>, Monika Tutaj<sup>80</sup>

### **Genome Editors Initiative**

Basem Al-Shayeb<sup>83</sup>, Rodolphe Barrangou<sup>84</sup>, Gabe Butterfield<sup>38</sup>, Jessie R. Davis<sup>48</sup>, Jordan L. Doman<sup>48</sup>, Nicholas G. Economos<sup>62</sup>, Jennifer Hamilton<sup>22</sup>, Tony P. Huang<sup>48</sup>, Nahid Iglesias<sup>38</sup>, Bibekananda Kar<sup>85</sup>, Luke W. Koblan<sup>48</sup>, Shannon M. Miller<sup>48</sup>, Kavini Nanayakkara<sup>85</sup>, Gregory A. Newby<sup>48</sup>, Patrick Pausch<sup>77</sup>, Alexandra S. Piotrowski-Daspit<sup>55</sup>, Elias Quijano<sup>62</sup>, Tim Reddy<sup>86</sup>, Ankit Sabharwal<sup>85</sup>, Hyunjin Shim<sup>83</sup>, Mark D. Wishman<sup>85</sup>

### **Affiliations**

<sup>1</sup>Department of Public Health Sciences, Division of Health Informatics, School of Medicine, University of California, Davis, Davis, CA, 95616 <sup>2</sup>The Jackson Laboratory, Bar Harbor, ME 04609 USA; <sup>3</sup>Oregon National Primate Research Center, Oregon Health & Science University, Beaverton, OR 97006 USA; <sup>4</sup>College of Agriculture, Food & Natural Resources, University of Missouri, Columbia, Columbia, MO 65211 USA; <sup>5</sup>Recombinetics, Inc., Eagan, MN 55121 USA; <sup>6</sup>Department of Medical Microbiology and Immunology and California National Primate Research Center, University of California, Davis, Davis, CA 95616 USA; <sup>7</sup>College of Veterinary Medicine, University of Missouri, Columbia, Columbia, MO 65211 USA; <sup>8</sup>Max Delbrück Center for Molecular Medicine, 13125, Berlin, Germany; <sup>9</sup>Department of Molecular and Human Genetics, Baylor College of Medicine, Houston, TX 77030 USA; <sup>10</sup>Department of Molecular Physiology and Biophysics, Baylor College of Medicine, Houston, TX 77030 USA; <sup>11</sup>Department of Pediatrics, University of Minnesota Medical School, Minneapolis, MN 55454 USA; <sup>12</sup>Imanis Life Sciences, LLC, Rochester, MN 55901 USA; <sup>13</sup>McGovern Institute for Brain Research, Massachusetts Institute of Technology, Cambridge, MA 02139 USA; <sup>14</sup>Institute of Developmental Genetics, Helmholtz Zentrum München, D-85764 Neuherberg, Germany; <sup>15</sup>Wisconsin Institute for Discovery, University of Wisconsin-Madison, Madison, WI 53715 USA; <sup>16</sup>Department of Radiology, Johns Hopkins University School of Medicine, Baltimore, MD 21205 USA; <sup>17</sup>Gladstone Institute of Cardiovascular Disease, Gladstone Institutes, San Francisco, CA 94158 USA; <sup>18</sup>Waisman Center and McPherson Eye Research Institute, University of Wisconsin-Madison, Madison, WI 53715 USA; <sup>19</sup>Department of Hematology, St. Jude Children's Research Hospital, Memphis, TN 60656 USA; <sup>20</sup>Department of Medicine, University of California, San Francisco, San Francisco, CA 94158 USA; <sup>21</sup>Department of Medicine/Division of Nephrology, University of Washington, Seattle, WA 98195 USA;

<sup>22</sup>Department of Molecular and Cell Biology, University of California, Berkeley, Berkeley, CA 94720 USA; <sup>23</sup>Division of Experimental Pathology, Department of Pathology, member Pittsburgh Liver Research Center and McGowan Institute of Regenerative Medicine, University of Pittsburgh School of Medicine, Pittsburgh, PA 15261 USA; <sup>24</sup>Waisman Center, University of Wisconsin-Madison, Madison, WI 53715 USA; <sup>25</sup>Department of Bone Marrow Transplant and Cellular Therapy, St. Jude Children's Research Hospital, Memphis, TN 60656 USA; <sup>26</sup>Department of Medicine, Massachusetts General Hospital, Boston, MA 02114 USA; <sup>27</sup>Kidney Research Institute, University of Washington, Seattle, WA 98104 USA; <sup>28</sup>Department of Medicine, Brigham and Women's Hospital, Boston, MA 02116 USA; <sup>29</sup>Robarts Research Institute, Western University, London, ON N6A 5K8, Canada; <sup>30</sup>NIST, Gaithersburg, MD 20899 USA; <sup>31</sup>Wyss Institute for Biologically Inspired Engineering, Harvard University, Cambridge, MA 02138 USA; <sup>32</sup>Department of Bioengineering, University of California, Berkeley, Berkeley, CA 94720 USA; <sup>33</sup>John T. Milliken Department of Internal Medicine, Cardiovascular Division Washington University in St. Louis, St. Louis, MO 63110 USA; <sup>34</sup>Computation Biology Department, Carnegie-Mellon University, Pittsburgh, PA 15213 USA; <sup>35</sup>Department of Neurology, Johns Hopkins University School of Medicine, Baltimore, MD 21205 USA; <sup>36</sup>Department of Comparative Medicine, University of Washington, Seattle, WA 98195 USA; <sup>37</sup>Graduate Program in Bioengineering, University of California Berkeley/University of California, San Francisco, San Francisco, CA 94158 USA; <sup>38</sup>Department of Biomedical Engineering, Duke University, Durham, NC 27708 USA; <sup>39</sup>Department of Laboratory Medicine and Pathology, University of Washington, Seattle, WA 98195 USA; <sup>40</sup>Department of Genome Sciences, University of Washington, Seattle, WA 98195 USA; <sup>41</sup>Center for Personalized Diagnostics, Biodesign Institute, Arizona State University, Tempe, AZ 85281 USA; <sup>42</sup>Department of Pediatrics, University of Wisconsin-Madison, Madison, WI 53715 USA; <sup>43</sup>Department of Biochemistry and Biophysics, University of California, San Francisco, San Francisco, CA 94158 USA; <sup>44</sup>Department of Biochemistry, University of Washington, Seattle, WA 98195 USA; <sup>45</sup>Morgridge Institute for Research, Madison, WI 53715 USA; <sup>46</sup>Departments of Chemical and Biomolecular Engineering, Bioengineering, and Molecular and Cellular Biology, University of California, Berkeley, Berkeley, CA 94720 USA; <sup>47</sup>Department of Pathology, University of Washington, Seattle, WA 98195 USA; <sup>48</sup>Merkin Institute of Transformative Technologies in Healthcare, Broad Institute, Cambridge, MA 02142 USA; <sup>49</sup>RNA Therapeutics Institute, University of Massachusetts Medical School, Worcester, Worcester, MA 01605 USA; <sup>50</sup>Department of Radiation Oncology, Washington University in St. Louis, St. Louis, MO 63110 USA; <sup>51</sup>Department of Biomedical Engineering, University of California, Davis, Davis, CA 95616 USA; <sup>52</sup>Department of Neurosurgery, Yale University, New Haven, CT 06522 USA; <sup>53</sup>Horae Gene Therapy Center, University of Massachusetts Medical School, Worcester, MA 01605 USA; <sup>54</sup>Department of Pediatrics, Baylor College of Medicine, Houston, TX 77005 USA; <sup>55</sup>Department of Biomedical Engineering, Yale University, New Haven, CT 06520 USA; <sup>56</sup>Department of Surgery, Beth Israel Deaconess Medical Center, Boston, MA 02215 USA; <sup>57</sup>Genome Engineering & iPSC Center, Department of Genetics, Washington University in St. Louis, St. Louis, MO 63110 USA; <sup>58</sup>Department of Pediatrics, Stanford University, Stanford, CA 94304 USA; <sup>59</sup>Department of Cardiology, Massachusetts General Hospital, Boston, MA 02214 USA; <sup>60</sup>Department of Surgery, Duke University, Durham, NC 27707 USA; <sup>61</sup>Otolaryngology-Head and Neck Surgery, Massachusetts Eye & Ear Infirmary, Boston, MA 02114 USA; <sup>62</sup>Department of Genetics, Yale School of Medicine, New Haven, CT 06510 USA; <sup>63</sup>Department of Pediatrics, Yale School of Medicine, New Haven, CT 06510 USA; <sup>64</sup>Department of Bioengineering, Rice University, Houston, TX 77005 USA; <sup>65</sup>Department of Molecular Genetics and Microbiology, Duke University, Durham, NC 27708 USA; <sup>66</sup>Department of Research,

Feldan Therapeutics, Québec, QC G1P 4S6, Canada; <sup>67</sup>Department of Neurological Surgery, Ohio State University, Columbus, OH 43210 USA; <sup>68</sup>Department of Bioengineering, University of California, Berkeley, Berkeley, CA 94720 USA; <sup>69</sup>Department of Radiation Oncology, Washington University in St. Louis, St. Louis, MO 63110 USA; <sup>70</sup>Department of Pulmonary Immunology, University of Texas Health Sciences Center at Tyler, Tyler, TX 75708 USA; <sup>71</sup>David H. Koch Institute for Integrative Cancer Research, Massachusetts Institute of Technology, Cambridge, MA 02139 USA; <sup>72</sup>Department of Biomedical Engineering, Columbia University Health Sciences, New York, NY 10032 USA; <sup>73</sup>Department of Pediatrics, University of Iowa, Iowa City, IA. 52242 USA; <sup>74</sup>Department of Biomedical Engineering, Tufts University, Medford, MA 02155 USA; <sup>75</sup>Department of Molecular, Cell and Cancer Biology, University of Massachusetts Medical School, Worcester, Worcester, MA 01605 USA; <sup>76</sup>Departments of Microbiology and Immunology, University of California, San Francisco, San Francisco, CA 94143 USA; <sup>77</sup>Innovative Genomics Institute, University of California, Berkeley, Berkeley, CA 94720 USA; <sup>78</sup>Wisconsin National Primate Research Center, University of Wisconsin-Madison, Madison, WI 53715; <sup>79</sup>Department of Nutrition/Center for Proteomics and Bioinformatics, Case Western Reserve University, Cleveland, OH, 44106 USA; <sup>80</sup>Department of Biomedical Engineering, Medical College of Wisconsin, Milwaukee, WI 53226, USA; <sup>81</sup>Center for Bioethics and Medical Humanities, Medical College of Wisconsin, Milwaukee, WI 53226 USA; <sup>82</sup>Department of Physiology, Medical College of Wisconsin, Milwaukee, WI 53226 USA; <sup>83</sup>Department of Plant and Microbial Biology, University of California, Berkeley, Berkeley, CA 94720 USA; <sup>84</sup>Department of Food, Bioprocessing and Nutrition Sciences, North Carolina State University, Raleigh, NC 27695 USA; <sup>85</sup>Department of Biochemistry and Molecular Biology, Mayo Clinic Rochester, Rochester, MN 55905 USA; <sup>86</sup>Department of Biostatistics and Bioinformatics, Duke University, Durham, NC 27708 USA
